# Supplementary material for: New 19-Residue Peptaibols from Trichoderma Clade Viride
Source: PubMed Central journal article supplement (PMC6165201; doi:10.3390/microorganisms6030085), 2018-08-12
Supplement: microorganisms-06-00085-s001.pdf [file microorganisms-06-00085-s001.pdf]

## Supplementary Data 1. Detailed description for residue parameterization

The non-standard residue, Aib (aminoisobutyric acid) was parameterized as part of one calculation along with 4 standard residues, alanine, serine, glycine and valine. The parameter file, .frcmod, is calculated collectively for all these residues and is provided below. To create their amber libraries in .off format, the respective structures of these residues were loaded using a leap script provided by R.E.D server. The reason for collective parameterization was to be able to compare the charges for standard residues with preexisting libraries of AmberTools16.

**Note:** The mol2 files contain information of Aib as residue units with free ends that can be readily used in building a peptide sequence. They were parameterized as ACE-AIB-NME units.

### Using leap,

```
loadAmberParams frcmod.known          #parameter file for all 5 residues
AIB = loadmol3 m3-c1_f2.mol2          #from R.E.D charge calculation results
```

```
saveoff AIB AIB.off                   #saving amber libraries
```

### The .mol2 file for AIB

```
@<TRIPOS>MOLECULE
F08
    13    12    1    0    1
SMALL
USER_CHARGES
@<TRIPOS>ATOM
  1 N1      1.179404    0.787225   -0.289608  N    1    F08  -0.4552    0.0000  ****
  2 H7      1.401639    1.218298   -1.161329  H    1    F08   0.2870    0.0000  ****
  3 C1     -0.246026    0.712307   -0.009072  CT   1    F08   0.1590    0.0000  ****
  4 C2     -0.513722    0.943419    1.490893  CT   1    F08  -0.1445    0.0000  ****
  5 C3     -0.874452    1.859278   -0.822371  CT   1    F08  -0.1445    0.0000  ****
  6 H8     -0.683793    1.725172   -1.881967  HC   1    F08   0.0464    0.0000  ****
  7 H9     -1.944751    1.917349   -0.681560  HC   1    F08   0.0464    0.0000  ****
  8 H10    -0.438130    2.800958   -0.509348  HC   1    F08   0.0464    0.0000  ****
  9 C6     -0.815324   -0.626254   -0.549026  C    1    F08   0.5633    0.0000  ****
 10 O      -0.117607   -1.349894   -1.206062  O    1    F08  -0.5435    0.0000  ****
 11 H1     -1.529198    1.266287    1.670775  HC   1    F08   0.0464    0.0000  ****
 12 H2      0.148540    1.726800    1.836879  HC   1    F08   0.0464    0.0000  ****
 13 H      -0.336510    0.060129    2.090571  HC   1    F08   0.0464    0.0000  ****
@<TRIPOS>BOND
  1    1    2    1
  2    1    3    1
  3    3    4    1
  4    3    5    1
  5    3    9    1
  6    4   11    1
  7    4   12    1
  8    4   13    1
  9    5    6    1
 10    5    7    1
 11    5    8    1
 12    9   10    1
@<TRIPOS>SUBSTRUCTURE
  1 F08          1 ****          0 ****  ****
@<TRIPOS>HEADTAIL
N1 1
```

C6 1  
@<TRIPOS>RESIDUECONNECT  
1 N1 C6 0 0 0

### The parameter file used for AIB residue

FRCMOD file generated by PyRED version SEP-2015 - q4md-forcefieldtools.org

| MASS | mass   | pol   | Source                |
|------|--------|-------|-----------------------|
| C    | 12.010 | 0.616 | taken from parm10.dat |
| CT   | 12.010 | 0.878 | taken from parm10.dat |
| CX   | 12.010 | 0.360 | taken from parm10.dat |
| H    | 1.008  | 0.161 | taken from parm10.dat |
| H1   | 1.008  | 0.135 | taken from parm10.dat |
| HC   | 1.008  | 0.135 | taken from parm10.dat |
| HO   | 1.008  | 0.135 | taken from parm10.dat |
| N    | 14.010 | 0.530 | taken from parm10.dat |
| O    | 16.000 | 0.434 | taken from parm10.dat |
| OH   | 16.000 | 0.465 | taken from parm10.dat |

| BOND  | K(kcal.mol <sup>-1</sup> .ang <sup>-2</sup> ) | Dist0(ang) | Source                        |
|-------|-----------------------------------------------|------------|-------------------------------|
| C -CT | 315.0                                         | 1.522      | adapted from parm10.dat 317.0 |
| C -CX | 315.0                                         | 1.522      | adapted from parm10.dat 317.0 |
| C -N  | 490.0                                         | 1.335      | taken from parm10.dat         |
| C -O  | 570.0                                         | 1.229      | taken from parm10.dat         |
| CT-CT | 310.0                                         | 1.526      | taken from parm10.dat         |
| CT-CX | 310.0                                         | 1.526      | taken from parm10.dat         |
| CT-H1 | 340.0                                         | 1.090      | taken from parm10.dat         |
| CT-HC | 340.0                                         | 1.090      | taken from parm10.dat         |
| CT-N  | 335.0                                         | 1.449      | adapted from parm10.dat 337.0 |
| CT-OH | 320.0                                         | 1.410      | taken from parm10.dat         |
| CX-H1 | 340.0                                         | 1.090      | taken from parm10.dat         |
| CX-N  | 335.0                                         | 1.449      | adapted from parm10.dat 337.0 |
| H -N  | 435.0                                         | 1.010      | adapted from parm10.dat 434.0 |
| HO-OH | 555.0                                         | 0.960      | adapted from parm10.dat 553.0 |

| ANGLE    | K(kcal.mol <sup>-1</sup> .rad <sup>-2</sup> ) | Theta0(deg) | Source                       |
|----------|-----------------------------------------------|-------------|------------------------------|
| CT-C -N  | 70.0                                          | 116.60      | taken from parm10.dat        |
| CT-C -O  | 80.0                                          | 120.40      | taken from parm10.dat        |
| CX-C -N  | 70.0                                          | 116.60      | taken from parm10.dat        |
| CX-C -O  | 80.0                                          | 120.40      | taken from parm10.dat        |
| N -C -O  | 80.0                                          | 122.90      | taken from parm10.dat        |
| C -CT-CT | 65.0                                          | 111.10      | adapted from parm10.dat 63.0 |
| C -CT-HC | 50.0                                          | 109.50      | taken from parm10.dat        |
| C -CT-N  | 65.0                                          | 110.10      | adapted from parm10.dat 63.0 |
| CT-CT-CT | 40.0                                          | 109.50      | taken from parm10.dat        |
| CT-CT-CX | 40.0                                          | 109.50      | taken from parm10.dat        |
| CT-CT-HC | 50.0                                          | 109.50      | taken from parm10.dat        |
| CT-CT-N  | 80.0                                          | 109.70      | taken from parm10.dat        |
| CX-CT-H1 | 50.0                                          | 109.50      | taken from parm10.dat        |
| CX-CT-HC | 50.0                                          | 109.50      | taken from parm10.dat        |
| CX-CT-OH | 50.0                                          | 109.50      | taken from parm10.dat        |
| H1-CT-H1 | 35.0                                          | 109.50      | taken from parm10.dat        |
| H1-CT-N  | 50.0                                          | 109.50      | taken from parm10.dat        |
| H1-CT-OH | 50.0                                          | 109.50      | taken from parm10.dat        |
| HC-CT-HC | 35.0                                          | 109.50      | taken from parm10.dat        |
| C -CX-CT | 65.0                                          | 111.10      | adapted from parm10.dat 63.0 |
| C -CX-H1 | 50.0                                          | 109.50      | taken from parm10.dat        |
| C -CX-N  | 65.0                                          | 110.10      | adapted from parm10.dat 63.0 |
| CT-CX-H1 | 50.0                                          | 109.50      | taken from parm10.dat        |
| CT-CX-N  | 80.0                                          | 109.70      | taken from parm10.dat        |
| H1-CX-H1 | 35.0                                          | 109.50      | taken from parm10.dat        |
| H1-CX-N  | 50.0                                          | 109.50      | taken from parm10.dat        |
| C -N -CT | 50.0                                          | 121.90      | taken from parm10.dat        |
| C -N -CX | 50.0                                          | 121.90      | taken from parm10.dat        |
| C -N -H  | 50.0                                          | 120.00      | taken from parm10.dat        |
| CT-N -H  | 50.0                                          | 118.04      | taken from parm10.dat        |
| CX-N -H  | 50.0                                          | 118.04      | taken from parm10.dat        |

CT-OH-HO 55.0 108.50 taken from parm10.dat

| DIHEDRAL    | Path   | V(kcal.mol <sup>-1</sup> .rad <sup>-1</sup> ) | Phase(deg.) | Period | Source                         |
|-------------|--------|-----------------------------------------------|-------------|--------|--------------------------------|
| N -C -CT-CT | 1      | 0.00000000e+00                                | 0.0         | -4.    | taken from parm10.dat          |
| N -C -CT-CT | 1      | 4.00000000e-01                                | 0.0         | -3.    | taken from parm10.dat          |
| N -C -CT-CT | 1      | 2.00000000e-01                                | 0.0         | -2.    | taken from parm10.dat          |
| N -C -CT-CT | 1      | 2.00000000e-01                                | 0.0         | 1.     | taken from parm10.dat          |
| N -C -CT-HC | 1      | 0.00000000e+00                                | 0.0         | 2.     | adapted from parm10.dat i.e X- |
| C-CT-X      | 0.0/6  |                                               |             |        |                                |
| N -C -CT-N  | 1      | 0.00000000e+00                                | 0.0         | 2.     | adapted from parm10.dat i.e X- |
| C-CT-X      | 0.0/6  |                                               |             |        |                                |
| O -C -CT-CT | 1      | 0.00000000e+00                                | 0.0         | 2.     | adapted from parm10.dat i.e X- |
| C-CT-X      | 0.0/6  |                                               |             |        |                                |
| O -C -CT-HC | 1      | 8.00000000e-01                                | 0.0         | -1.    | taken from parm10.dat          |
| O -C -CT-HC | 1      | 0.00000000e+00                                | 0.0         | -2.    | taken from parm10.dat          |
| O -C -CT-HC | 1      | 8.00000000e-02                                | 180.0       | 3.     | taken from parm10.dat          |
| O -C -CT-N  | 1      | 0.00000000e+00                                | 0.0         | 2.     | adapted from parm10.dat i.e X- |
| C-CT-X      | 0.0/6  |                                               |             |        |                                |
| N -C -CX-CT | 1      | 0.00000000e+00                                | 0.0         | -4.    | taken from parm10.dat          |
| N -C -CX-CT | 1      | 4.00000000e-01                                | 0.0         | -3.    | taken from parm10.dat          |
| N -C -CX-CT | 1      | 2.00000000e-01                                | 0.0         | -2.    | taken from parm10.dat          |
| N -C -CX-CT | 1      | 2.00000000e-01                                | 0.0         | 1.     | taken from parm10.dat          |
| N -C -CX-H1 | 1      | 0.00000000e+00                                | 0.0         | 2.     | adapted from parm10.dat i.e X- |
| C-CX-X      | 0.0/6  |                                               |             |        |                                |
| N -C -CX-N  | 1      | 0.00000000e+00                                | 0.0         | -4.    | taken from parm10.dat          |
| N -C -CX-N  | 1      | 5.50000000e-01                                | 180.0       | -3.    | taken from parm10.dat          |
| N -C -CX-N  | 1      | 1.58000000e+00                                | 180.0       | -2.    | taken from parm10.dat          |
| N -C -CX-N  | 1      | 4.50000000e-01                                | 180.0       | 1.     | taken from parm10.dat          |
| O -C -CX-CT | 1      | 0.00000000e+00                                | 0.0         | 2.     | adapted from parm10.dat i.e X- |
| C-CX-X      | 0.0/6  |                                               |             |        |                                |
| O -C -CX-H1 | 1      | 8.00000000e-01                                | 0.0         | -1.    | taken from parm10.dat          |
| O -C -CX-H1 | 1      | 0.00000000e+00                                | 0.0         | -2.    | taken from parm10.dat          |
| O -C -CX-H1 | 1      | 8.00000000e-02                                | 180.0       | 3.     | taken from parm10.dat          |
| O -C -CX-N  | 1      | 0.00000000e+00                                | 0.0         | 2.     | adapted from parm10.dat i.e X- |
| C-CX-X      | 0.0/6  |                                               |             |        |                                |
| CT-C -N -CT | 1      | 2.50000000e+00                                | 180.0       | 2.     | adapted from parm10.dat i.e X- |
| C-N-X       | 10.0/4 |                                               |             |        |                                |
| CT-C -N -CX | 1      | 2.50000000e+00                                | 180.0       | 2.     | adapted from parm10.dat i.e X- |
| C-N-X       | 10.0/4 |                                               |             |        |                                |
| CT-C -N -H  | 1      | 2.50000000e+00                                | 180.0       | 2.     | adapted from parm10.dat i.e X- |
| C-N-X       | 10.0/4 |                                               |             |        |                                |
| CX-C -N -CT | 1      | 2.50000000e+00                                | 180.0       | 2.     | adapted from parm10.dat i.e X- |
| C-N-X       | 10.0/4 |                                               |             |        |                                |
| CX-C -N -H  | 1      | 2.50000000e+00                                | 180.0       | 2.     | adapted from parm10.dat i.e X- |
| C-N-X       | 10.0/4 |                                               |             |        |                                |
| O -C -N -CT | 1      | 2.50000000e+00                                | 180.0       | 2.     | adapted from parm10.dat i.e X- |
| C-N-X       | 10.0/4 |                                               |             |        |                                |
| O -C -N -CX | 1      | 2.50000000e+00                                | 180.0       | 2.     | adapted from parm10.dat i.e X- |
| C-N-X       | 10.0/4 |                                               |             |        |                                |
| O -C -N -H  | 1      | 2.50000000e+00                                | 180.0       | -2.    | taken from parm10.dat          |
| O -C -N -H  | 1      | 2.00000000e+00                                | 0.0         | 1.     | taken from parm10.dat          |
| C -CT-CT-CT | 1      | 1.55555556e-01                                | 0.0         | 3.     | adapted from parm10.dat i.e X- |
| CT-CT-X     | 1.4/9  |                                               |             |        |                                |
| C -CT-CT-HC | 1      | 1.55555556e-01                                | 0.0         | 3.     | adapted from parm10.dat i.e X- |
| CT-CT-X     | 1.4/9  |                                               |             |        |                                |
| CT-CT-CT-CT | 1      | 1.80000000e-01                                | 0.0         | -3.    | taken from parm10.dat          |
| CT-CT-CT-CT | 1      | 2.50000000e-01                                | 180.0       | -2.    | taken from parm10.dat          |
| CT-CT-CT-CT | 1      | 2.00000000e-01                                | 180.0       | 1.     | taken from parm10.dat          |
| CT-CT-CT-HC | 1      | 1.60000000e-01                                | 0.0         | 3.     | taken from parm10.dat          |
| CT-CT-CT-N  | 1      | 1.55555556e-01                                | 0.0         | 3.     | adapted from parm10.dat i.e X- |
| CT-CT-X     | 1.4/9  |                                               |             |        |                                |
| CX-CT-CT-HC | 1      | 1.60000000e-01                                | 0.0         | 3.     | taken from parm10.dat          |
| HC-CT-CT-HC | 1      | 1.50000000e-01                                | 0.0         | 3.     | taken from parm10.dat          |
| HC-CT-CT-N  | 1      | 1.55555556e-01                                | 0.0         | 3.     | adapted from parm10.dat i.e X- |
| CT-CT-X     | 1.4/9  |                                               |             |        |                                |
| CT-CT-CX-C  | 1      | 1.55555556e-01                                | 0.0         | 3.     | adapted from parm10.dat i.e X- |
| CT-CX-X     | 1.4/9  |                                               |             |        |                                |

|             |         |                                               |             |        |                                |
|-------------|---------|-----------------------------------------------|-------------|--------|--------------------------------|
| CT-CT-CX-H1 | 1       | 1.55555556e-01                                | 0.0         | 3.     | adapted from parm10.dat i.e X- |
| CT-CX-X     | 1.4/9   |                                               |             |        |                                |
| CT-CT-CX-N  | 1       | 1.55555556e-01                                | 0.0         | 3.     | adapted from parm10.dat i.e X- |
| CT-CX-X     | 1.4/9   |                                               |             |        |                                |
| H1-CT-CX-C  | 1       | 1.55555556e-01                                | 0.0         | 3.     | adapted from parm10.dat i.e X- |
| CT-CX-X     | 1.4/9   |                                               |             |        |                                |
| H1-CT-CX-H1 | 1       | 1.55555556e-01                                | 0.0         | 3.     | adapted from parm10.dat i.e X- |
| CT-CX-X     | 1.4/9   |                                               |             |        |                                |
| H1-CT-CX-N  | 1       | 1.55555556e-01                                | 0.0         | 3.     | adapted from parm10.dat i.e X- |
| CT-CX-X     | 1.4/9   |                                               |             |        |                                |
| HC-CT-CX-C  | 1       | 1.55555556e-01                                | 0.0         | 3.     | adapted from parm10.dat i.e X- |
| CT-CX-X     | 1.4/9   |                                               |             |        |                                |
| HC-CT-CX-H1 | 1       | 1.55555556e-01                                | 0.0         | 3.     | adapted from parm10.dat i.e X- |
| CT-CX-X     | 1.4/9   |                                               |             |        |                                |
| HC-CT-CX-N  | 1       | 1.55555556e-01                                | 0.0         | 3.     | adapted from parm10.dat i.e X- |
| CT-CX-X     | 1.4/9   |                                               |             |        |                                |
| OH-CT-CX-C  | 1       | 1.55555556e-01                                | 0.0         | 3.     | adapted from parm10.dat i.e X- |
| CT-CX-X     | 1.4/9   |                                               |             |        |                                |
| OH-CT-CX-H1 | 1       | 0.00000000e+00                                | 0.0         | -3.    | taken from parm10.dat          |
| OH-CT-CX-H1 | 1       | 2.50000000e-01                                | 0.0         | 1.     | taken from parm10.dat          |
| OH-CT-CX-N  | 1       | 1.55555556e-01                                | 0.0         | 3.     | adapted from parm10.dat i.e X- |
| CT-CX-X     | 1.4/9   |                                               |             |        |                                |
| C -CT-N -C  | 1       | 0.00000000e+00                                | 0.0         | 2.     | adapted from parm10.dat i.e X- |
| CT-N-X      | 0.0/6   |                                               |             |        |                                |
| C -CT-N -H  | 1       | 0.00000000e+00                                | 0.0         | 2.     | adapted from parm10.dat i.e X- |
| CT-N-X      | 0.0/6   |                                               |             |        |                                |
| CT-CT-N -C  | 1       | 0.00000000e+00                                | 0.0         | -4.    | taken from parm10.dat          |
| CT-CT-N -C  | 1       | 4.00000000e-01                                | 0.0         | -3.    | taken from parm10.dat          |
| CT-CT-N -C  | 1       | 2.00000000e+00                                | 0.0         | -2.    | taken from parm10.dat          |
| CT-CT-N -C  | 1       | 2.00000000e+00                                | 0.0         | 1.     | taken from parm10.dat          |
| CT-CT-N -H  | 1       | 0.00000000e+00                                | 0.0         | 2.     | adapted from parm10.dat i.e X- |
| CT-N-X      | 0.0/6   |                                               |             |        |                                |
| H1-CT-N -C  | 1       | 0.00000000e+00                                | 0.0         | 2.     | adapted from parm10.dat i.e X- |
| CT-N-X      | 0.0/6   |                                               |             |        |                                |
| H1-CT-N -H  | 1       | 0.00000000e+00                                | 0.0         | 2.     | adapted from parm10.dat i.e X- |
| CT-N-X      | 0.0/6   |                                               |             |        |                                |
| CX-CT-OH-HO | 1       | 1.60000000e-01                                | 0.0         | -3.    | taken from parm10.dat          |
| CX-CT-OH-HO | 1       | 2.50000000e-01                                | 0.0         | 1.     | taken from parm10.dat          |
| H1-CT-OH-HO | 1       | 1.66666667e-01                                | 0.0         | 3.     | adapted from parm10.dat i.e X- |
| CT-OH-X     | 0.5/3   |                                               |             |        |                                |
| C -CX-N -C  | 1       | 0.00000000e+00                                | 0.0         | -4.    | taken from parm10.dat          |
| C -CX-N -C  | 1       | 4.20000000e-01                                | 0.0         | -3.    | taken from parm10.dat          |
| C -CX-N -C  | 1       | 2.70000000e-01                                | 0.0         | -2.    | taken from parm10.dat          |
| C -CX-N -C  | 1       | 0.00000000e+00                                | 0.0         | 1.     | taken from parm10.dat          |
| C -CX-N -H  | 1       | 0.00000000e+00                                | 0.0         | 2.     | adapted from parm10.dat i.e X- |
| CX-N-X      | 0.0/6   |                                               |             |        |                                |
| CT-CX-N -C  | 1       | 0.00000000e+00                                | 0.0         | -4.    | taken from parm10.dat          |
| CT-CX-N -C  | 1       | 4.00000000e-01                                | 0.0         | -3.    | taken from parm10.dat          |
| CT-CX-N -C  | 1       | 2.00000000e+00                                | 0.0         | -2.    | taken from parm10.dat          |
| CT-CX-N -C  | 1       | 2.00000000e+00                                | 0.0         | 1.     | taken from parm10.dat          |
| CT-CX-N -H  | 1       | 0.00000000e+00                                | 0.0         | 2.     | adapted from parm10.dat i.e X- |
| CX-N-X      | 0.0/6   |                                               |             |        |                                |
| H1-CX-N -C  | 1       | 0.00000000e+00                                | 0.0         | 2.     | adapted from parm10.dat i.e X- |
| CX-N-X      | 0.0/6   |                                               |             |        |                                |
| H1-CX-N -H  | 1       | 0.00000000e+00                                | 0.0         | 2.     | adapted from parm10.dat i.e X- |
| CX-N-X      | 0.0/6   |                                               |             |        |                                |
| IMPROPER    |         | V(kcal.mol <sup>-1</sup> .rad <sup>-1</sup> ) | Phase(deg.) | Period | Source                         |
| CT-N -C -O  |         | 1.05000000e+01                                | 180.0       | 2.     | adapted from parm10.dat i.e X- |
| X-C-O       |         |                                               |             |        |                                |
| CX-N -C -O  |         | 1.05000000e+01                                | 180.0       | 2.     | adapted from parm10.dat i.e X- |
| X-C-O       |         |                                               |             |        |                                |
| C -CT-N -H  |         | 1.10000000e+00                                | 180.0       | 2.     | taken from parm10.dat          |
| C -CX-N -H  |         | 1.10000000e+00                                | 180.0       | 2.     | taken from parm10.dat          |
| NONBON      | R*(ang) | Eps(kcal.mol <sup>-1</sup> )                  |             |        | Source                         |
| C           | 1.9080  | 0.08600000                                    |             |        | taken from parm10.dat          |

|    |        |            |                       |
|----|--------|------------|-----------------------|
| CT | 1.9080 | 0.10940000 | taken from parm10.dat |
| CX | 1.9080 | 0.10940000 | taken from parm10.dat |
| H  | 0.6000 | 0.01570000 | taken from parm10.dat |
| H1 | 1.3870 | 0.01570000 | taken from parm10.dat |
| HC | 1.4870 | 0.01570000 | taken from parm10.dat |
| HO | 0.0000 | 0.00000000 | taken from parm10.dat |
| N  | 1.8240 | 0.17000000 | taken from parm10.dat |
| O  | 1.6612 | 0.21000000 | taken from parm10.dat |
| OH | 1.7210 | 0.21040000 | taken from parm10.dat |

### The .mol2 file for Leuol

0 0 2

This is a remark line

LEO.res

LEO XYZ 0

0.0000

|    |      |    |   |           |           |           |          |
|----|------|----|---|-----------|-----------|-----------|----------|
| 1  | DUMM | DU | M | 999.000   | 999.0     | -999.0    | .00000   |
| 2  | DUMM | DU | M | 999.000   | -999.0    | 999.0     | .00000   |
| 3  | DUMM | DU | M | -999.000  | 999.0     | 999.0     | .00000   |
| 4  | N    | N  | M | -1.110000 | 0.163000  | -0.623000 | -0.65514 |
| 5  | H    | H  | E | -1.074000 | 0.037000  | -1.628000 | 0.33400  |
| 6  | CA   | CT | M | -0.007000 | 0.861000  | 0.018000  | 0.13835  |
| 7  | HA   | H1 | E | -0.146000 | 0.721000  | 1.092000  | 0.14813  |
| 8  | CB   | CT | 3 | 1.340000  | 0.295000  | -0.425000 | -0.09226 |
| 9  | HB2  | HC | E | 2.127000  | 0.854000  | 0.095000  | 0.04077  |
| 10 | HB3  | HC | E | 1.472000  | 0.502000  | -1.499000 | 0.04077  |
| 11 | CG   | CT | 3 | 1.521000  | -1.204000 | -0.172000 | 0.16599  |
| 12 | HG   | HC | E | 0.759000  | -1.743000 | -0.752000 | -0.00399 |
| 13 | CD1  | CT | 3 | 2.895000  | -1.651000 | -0.671000 | -0.21959 |
| 14 | HD11 | HC | E | 3.688000  | -1.151000 | -0.103000 | 0.05115  |
| 15 | HD12 | HC | E | 3.035000  | -1.408000 | -1.730000 | 0.05115  |
| 16 | HD13 | HC | E | 3.025000  | -2.731000 | -0.550000 | 0.05115  |
| 17 | CD2  | CT | 3 | 1.335000  | -1.564000 | 1.301000  | -0.21959 |
| 18 | HD21 | HC | E | 0.318000  | -1.367000 | 1.648000  | 0.05115  |
| 19 | HD22 | HC | E | 2.029000  | -0.987000 | 1.924000  | 0.05115  |
| 20 | HD23 | HC | E | 1.545000  | -2.626000 | 1.465000  | 0.05115  |
| 21 | C    | CT | M | -0.128000 | 2.352000  | -0.273000 | 0.21035  |
| 22 | H3   | H1 | E | -1.107000 | 2.701000  | 0.082000  | 0.01873  |
| 23 | H1   | H1 | E | -0.079000 | 2.520000  | -1.362000 | 0.01873  |
| 24 | OAL  | OH | S | 0.944000  | 3.007000  | 0.402000  | -0.67748 |
| 25 | HAL  | HO | E | 0.827000  | 3.964000  | 0.286000  | 0.44533  |

LOOP

IMPROPER

-M CA N H

DONE

STOP

### Parameter file for Leuol

remark goes here

MASS

N 14.010

0.530

same as n

|    |        |       |            |
|----|--------|-------|------------|
| H  | 1.008  | 0.161 | same as hn |
| CT | 12.010 | 0.878 | same as c3 |
| H1 | 1.008  | 0.135 | same as hc |
| HC | 1.008  | 0.135 | same as hc |
| OH | 16.000 | 0.465 | same as oh |
| HO | 1.008  | 0.135 | same as ho |

#### BOND

|       |        |       |               |
|-------|--------|-------|---------------|
| N -H  | 410.20 | 1.009 | same as hn-n  |
| N -CT | 330.60 | 1.460 | same as c3-n  |
| CT-H1 | 337.30 | 1.092 | same as c3-hc |
| CT-CT | 303.10 | 1.535 | same as c3-c3 |
| CT-HC | 337.30 | 1.092 | same as c3-hc |
| CT-OH | 314.10 | 1.426 | same as c3-oh |
| OH-HO | 369.60 | 0.974 | same as ho-oh |

#### ANGLE

|          |        |         |                  |
|----------|--------|---------|------------------|
| N -CT-H1 | 49.800 | 109.500 | same as hc-c3-n  |
| N -CT-CT | 65.900 | 112.130 | same as c3-c3-n  |
| H -N -CT | 46.000 | 116.780 | same as c3-n -hn |
| CT-CT-HC | 46.400 | 110.050 | same as c3-c3-hc |
| CT-CT-CT | 63.200 | 110.630 | same as c3-c3-c3 |
| CT-CT-H1 | 46.400 | 110.050 | same as c3-c3-hc |
| CT-CT-OH | 67.700 | 109.430 | same as c3-c3-oh |
| HC-CT-HC | 39.400 | 108.350 | same as hc-c3-hc |
| CT-OH-HO | 47.100 | 108.160 | same as c3-oh-ho |
| H1-CT-H1 | 39.400 | 108.350 | same as hc-c3-hc |
| H1-CT-OH | 51.100 | 109.500 | same as hc-c3-oh |

#### DIHE

|             |   |       |       |       |                    |
|-------------|---|-------|-------|-------|--------------------|
| N -CT-CT-HC | 1 | 0.156 | 0.000 | 3.000 | same as X -c3-c3-X |
| N -CT-CT-CT | 1 | 0.156 | 0.000 | 3.000 | same as X -c3-c3-X |
| N -CT-CT-H1 | 1 | 0.156 | 0.000 | 3.000 | same as X -c3-c3-X |
| N -CT-CT-OH | 1 | 0.156 | 0.000 | 3.000 | same as X -c3-c3-X |
| H -N -CT-H1 | 1 | 0.000 | 0.000 | 2.000 | same as X -c3-n -X |
| H -N -CT-CT | 1 | 0.000 | 0.000 | 2.000 | same as X -c3-n -X |
| CT-CT-CT-HC | 1 | 0.156 | 0.000 | 3.000 | same as X -c3-c3-X |
| CT-CT-CT-CT | 1 | 0.156 | 0.000 | 3.000 | same as X -c3-c3-X |
| CT-CT-OH-HO | 1 | 0.167 | 0.000 | 3.000 | same as X -c3-oh-X |
| H1-CT-CT-HC | 1 | 0.156 | 0.000 | 3.000 | same as X -c3-c3-X |
| H1-CT-CT-CT | 1 | 0.156 | 0.000 | 3.000 | same as X -c3-c3-X |
| H1-CT-CT-H1 | 1 | 0.156 | 0.000 | 3.000 | same as X -c3-c3-X |
| H1-CT-CT-OH | 1 | 0.156 | 0.000 | 3.000 | same as X -c3-c3-X |
| CT-CT-CT-OH | 1 | 0.156 | 0.000 | 3.000 | same as X -c3-c3-X |
| HC-CT-CT-HC | 1 | 0.156 | 0.000 | 3.000 | same as X -c3-c3-X |
| H1-CT-OH-HO | 1 | 0.167 | 0.000 | 3.000 | same as X -c3-oh-X |

#### IMPROPER

#### NONBON

|    |        |        |            |
|----|--------|--------|------------|
| N  | 1.8240 | 0.1700 | same as n  |
| H  | 0.6000 | 0.0157 | same as hn |
| CT | 1.9080 | 0.1094 | same as c3 |
| H1 | 1.4870 | 0.0157 | same as hc |
| HC | 1.4870 | 0.0157 | same as hc |
| OH | 1.7210 | 0.2104 | same as oh |
| HO | 0.0000 | 0.0000 | same as ho |

Supplementary Table 1. Diagnostic fragment ions of peptaibols detected with the full scan MS measurement of peptaibol extracts from plate cultures of *T. gamsii* SZMC

1656

| Peptide    | M      | [M+Na] <sup>+</sup> | [M+2Na] <sup>2+</sup> | b <sub>1</sub> | b <sub>2</sub> | b <sub>3</sub> | b <sub>4</sub> | b <sub>5</sub> | b <sub>6</sub> | b <sub>7</sub> | b <sub>8</sub> | b <sub>9</sub> | b <sub>10</sub> | b <sub>11</sub> | b <sub>12</sub> | y <sub>7</sub> |
|------------|--------|---------------------|-----------------------|----------------|----------------|----------------|----------------|----------------|----------------|----------------|----------------|----------------|-----------------|-----------------|-----------------|----------------|
| Pept-Ia    | 1861.1 | 1884.1              | 953.55                | 128.0          | 185.0          | 256.0          | 341.0          | 440.1          | n.d.           | 653.4          | 738.4          | 823.5          | 910.5           | 1023.8          | 1108.6          | 754.5          |
| Pept-Ib    | 1876.2 | 1899.2              | 961.1                 | 128.0          | 185.0          | 256.0          | 341.0          | 440.1          | n.d.           | 653.4          | 738.4          | 823.5          | 910.5           | 1023.8          | 1108.6          | 768.5          |
| Pept-IIa   | 1876.1 | 1899.1              | 961.05                | 128.0          | 185.0          | 256.0          | 341.1          | 454.2          | n.d.           | 667.4          | 752.5          | 837.5          | 924.5           | 1037.3          | 1122.6          | 754.5          |
| Pept-IIb   | 1875.2 | 1898.2              | 960.6                 | 128.0          | 185.0          | 256.0          | 341.0          | 440.1          | n.d.           | 653.4          | 738.4          | 823.5          | 910.5           | 1023.8          | 1108.6          | 768.5          |
| Pept-IIIa  | 1876.2 | 1899.2              | 961.1                 | 128.0          | 185.0          | 256.0          | 341.1          | 454.2          | n.d.           | 667.4          | 752.5          | 837.5          | 924.5           | 1037.3          | 1122.6          | 754.5          |
| Pept-IIIb  | 1875.3 | 1898.3              | 960.65                | 128.0          | 185.0          | 256.0          | 341.0          | 440.1          | n.d.           | 653.4          | 738.4          | 823.5          | 910.5           | 1023.8          | 1108.6          | 768.5          |
| Pept-IVa   | 1875.2 | 1898.2              | 960.6                 | 128.0          | 185.0          | 256.0          | 341.1          | 454.2          | n.d.           | 667.4          | 752.5          | 837.5          | 924.5           | 1037.3          | 1122.6          | 754.5          |
| Pept-IVb   | 1875.2 | 1898.2              | 960.6                 | 128.0          | 185.0          | 256.0          | 341.0          | 440.1          | n.d.           | 653.4          | 738.4          | 823.5          | 910.5           | 1023.8          | 1108.6          | 768.5          |
| Pept-Va    | 1876.2 | 1899.2              | 961.1                 | 128.0          | 185.0          | 256.0          | 341.1          | 454.2          | n.d.           | 667.4          | 752.5          | 837.5          | 924.5           | 1037.3          | 1122.6          | 754.5          |
| Pept-Vb    | 1890.2 | 1913.2              | 968.1                 | 128.0          | 185.0          | 256.0          | 341.1          | 454.2          | n.d.           | 667.4          | 752.5          | 837.5          | 924.5           | 1037.3          | 1122.6          | 768.5          |
| Pept-VIa   | 1876.2 | 1899.2              | 961.1                 | 128.0          | 185.0          | 256.0          | 341.1          | 454.2          | n.d.           | 667.4          | 752.5          | 837.5          | 924.5           | 1037.3          | 1122.6          | 754.5          |
| Pept-VIb   | 1890.2 | 1913.2              | 968.1                 | 128.0          | 185.0          | 256.0          | 341.1          | 454.2          | n.d.           | 667.4          | 752.5          | 837.5          | 924.5           | 1037.3          | 1122.6          | 768.5          |
| Pept-VII   | 1889.3 | 1912.3              | 967.65                | 128.0          | 185.0          | 256.0          | 341.1          | 454.2          | n.d.           | 667.4          | 752.5          | 837.5          | 924.5           | 1037.3          | 1122.6          | 768.5          |
| Pept-VIIIa | 1874.2 | 1897.2              | 960.1                 | 128.0          | 185.0          | 256.0          | 341.1          | 454.2          | n.d.           | 667.4          | 752.5          | 837.5          | 924.5           | 1037.3          | 1122.6          | 754.5          |
| Pept-VIIIb | 1890.2 | 1913.2              | 968.1                 | 128.0          | 185.0          | 256.0          | 341.1          | 454.2          | n.d.           | 667.4          | 752.5          | 837.5          | 924.5           | 1037.3          | 1122.6          | 768.5          |
| Pept-IX    | 1874.5 | 1897.5              | 960.25                | 128.0          | 184.9          | 256.0          | 341.3          | 454.2          | n.d.           | 667.4          | 752.4          | 837.5          | 908.6           | 1021.7          | 1106.7          | 768.5          |
| Pept-X     | 1904.2 | 1927.2              | 975.1                 | 128.0          | 199.0          | 270.0          | 355.0          | 467.9          | n.d.           | 681.4          | 766.5          | 851.5          | 938.5           | 1051.0          | 1136.8          | 768.5          |
| Pept-XI    | 1903.3 | 1926.3              | 974.65                | 128.0          | 199.0          | 270.0          | 355.0          | 467.9          | n.d.           | 681.4          | 766.5          | 851.5          | 938.5           | 1051.0          | 1136.8          | 768.5          |
| Pept-XII   | 1904.2 | 1927.2              | 975.1                 | 128.0          | 199.0          | 270.0          | 355.0          | 467.9          | n.d.           | 681.4          | 766.5          | 851.5          | 938.5           | 1051.0          | 1136.8          | 768.5          |

n.d.: not detected

Supplementary Table 2. Diagnostic fragment ions of peptaibols detected with the full scan MS measurement of peptaibol extracts from plate cultures of *T. koningiopsis* SZMC 12500

| Peptide           | M      | [M+Na] <sup>+</sup> | [M+2Na] <sup>2+</sup> | b <sub>1</sub> | b <sub>2</sub> | b <sub>3</sub> | b <sub>4</sub> | b <sub>5</sub> | b <sub>6</sub> | b <sub>7</sub> | b <sub>8</sub> | b <sub>9</sub> | b <sub>10</sub> | b <sub>11</sub> | b <sub>12</sub> | y <sub>7</sub> |
|-------------------|--------|---------------------|-----------------------|----------------|----------------|----------------|----------------|----------------|----------------|----------------|----------------|----------------|-----------------|-----------------|-----------------|----------------|
| Koningiopsin Ia   | 1875.5 | 1898.5              | 960.75                | 128.0          | 199.1          | 270.0          | 355.1          | 453.3          | n.d.           | 666.4          | 751.5          | 836.6          | 923.5           | 1037.6          | 1122.2          | 754.5          |
| Koningiopsin Ib   | 1889.5 | 1912.5              | 967.75                | 128.0          | 199.1          | 270.0          | 355.1          | 453.3          | n.d.           | 666.4          | 751.5          | 836.6          | 923.5           | 1037.6          | 1122.2          | 768.5          |
| Koningiopsin IIa  | 1890.5 | 1913.5              | 968.25                | 128.0          | 199.0          | 270.0          | 355.0          | 440.2          | n.d.           | 653.4          | 738.4          | 850.9          | 938.6           | 1050.9          | 1136.8          | 754.5          |
| Koningiopsin IIb  | 1889.6 | 1912.6              | 967.8                 | 128.1          | 199.1          | 270.0          | 355.1          | 440.1          | n.d.           | 653.4          | 738.4          | 822.5          | 922.5           | 1035.8          | 1120.8          | 768.5          |
| Koningiopsin IIIa | 1891.6 | 1914.6              | 968.8                 | 128.1          | 199.0          | 270.1          | 355.1          | 426.0          | n.d.           | 639.3          | 724.5          | 836.4          | 923.5           | 1037.1          | 1122.6          | 755.5          |
| Koningiopsin IIIb | 1873.6 | 1896.6              | 959.8                 | 128.1          | 199.1          | 270.0          | 355.1          | 440.1          | n.d.           | 653.4          | 738.4          | 822.5          | 922.5           | 1035.8          | 1120.8          | 754.5          |
| Koningiopsin IV   | 1903.6 | 1926.6              | 974.8                 | 128.0          | 199.0          | 270.0          | 355.0          | 440.2          | n.d.           | 653.4          | 738.4          | 850.9          | 938.6           | 1050.9          | 1136.8          | 768.5          |
| Koningiopsin Va   | 1903.6 | 1926.6              | 974.8                 | 128.0          | 199.0          | 270.0          | 355.0          | 440.2          | n.d.           | 653.4          | 738.4          | 850.9          | 938.6           | 1050.9          | 1136.8          | 768.5          |
| Koningiopsin Vb   | 1905.6 | 1928.6              | 975.8                 | 128.0          | 199.0          | 270.0          | 355.0          | 440.2          | n.d.           | 653.4          | 738.4          | 850.9          | 938.6           | 1050.9          | 1136.8          | 769.5          |
| Koningiopsin VIa  | 1888.6 | 1911.6              | 967.3                 | 128.1          | 199.1          | 270.1          | 355.0          | 440.2          | n.d.           | 653.3          | 738.4          | 851.6          | 921.6           | 1035.8          | 1120.7          | 768.5          |
| Koningiopsin VIb  | 1888.7 | 1911.7              | 967.35                | 128.1          | 199.1          | 270.1          | 355.0          | 440.2          | n.d.           | 653.3          | 738.4          | 851.6          | 921.6           | 1035.8          | 1120.7          | 769.5          |

n.d.: not detected



Supplementary Table 3. Diagnostic fragment ions of acylium ion ( $\gamma_7$ ) detected with MS<sup>2</sup> measurements of peptaibol extracts from plate cultures of *T. gamsii* SZMC 1656

| Peptide    | $\gamma_7$ | $\gamma_7 - \text{H}_2\text{O}$ | $\gamma_7 - \text{AA (19)}$ | $\gamma_7 - \text{AA (19-18)}$ | $\gamma_7 - \text{AA (19-17)}$ | $\gamma_7 - \text{AA (19-16)}$ |
|------------|------------|---------------------------------|-----------------------------|--------------------------------|--------------------------------|--------------------------------|
| Pept-Ia    | 754.5      | 736.5                           | 637.4                       | 509.4                          | 381.4                          | 282.3                          |
| Pept-Ib    | 768.5      | 750.5                           | 651.4                       | 523.4                          | 395.4                          | 282.4                          |
| Pept-IIa   | 754.5      | 736.5                           | 637.4                       | 509.4                          | 381.4                          | 282.3                          |
| Pept-IIb   | 768.5      | 750.5                           | 651.4                       | 523.4                          | 395.4                          | 282.4                          |
| Pept-IIIa  | 754.5      | 736.5                           | 637.4                       | 509.4                          | 381.4                          | 282.3                          |
| Pept-IIIb  | 768.5      | 750.5                           | 651.4                       | 523.4                          | 395.4                          | 282.4                          |
| Pept-IVa   | 754.5      | 736.5                           | 637.4                       | 509.4                          | 381.4                          | 282.3                          |
| Pept-IVb   | 768.5      | 750.5                           | 651.4                       | 523.4                          | 395.4                          | 282.4                          |
| Pept-Va    | 754.5      | 736.5                           | 637.4                       | 509.4                          | 381.4                          | 282.3                          |
| Pept-Vb    | 768.5      | 750.5                           | 651.4                       | 523.4                          | 395.4                          | 282.4                          |
| Pept-VIa   | 754.5      | 736.5                           | 637.4                       | 509.4                          | 381.4                          | 282.3                          |
| Pept-VIb   | 768.5      | 750.5                           | 651.4                       | 523.4                          | 395.4                          | 282.4                          |
| Pept-VII   | 768.5      | 750.5                           | 651.4                       | 523.4                          | 395.4                          | 282.4                          |
| Pept-VIIIa | 754.5      | 736.5                           | 637.4                       | 509.4                          | 381.4                          | 282.3                          |
| Pept-VIIIb | 768.5      | 750.5                           | 651.4                       | 523.4                          | 395.4                          | 282.4                          |
| Pept-IX    | 768.5      | 750.5                           | 651.4                       | 523.4                          | 395.4                          | 282.4                          |
| Pept-X     | 768.5      | 750.5                           | 651.4                       | 523.4                          | 395.4                          | 282.4                          |
| Pept-XI    | 768.5      | 750.5                           | 651.4                       | 523.4                          | 395.4                          | 282.4                          |
| Pept-XII   | 768.5      | 750.5                           | 651.4                       | 523.4                          | 395.4                          | 282.4                          |

Supplementary Table 4. Diagnostic fragment ions of acylium ion ( $y_7$ ) detected with MS<sup>2</sup> measurements of peptaibol extracts from plate cultures of *T. koningiopsis* SZMC 12500

| Peptide           | $y_7$ | $y_7 - H_2O$ | $y_7 - AA (19)$ | $y_7 - AA (19-18)$ | $y_7 - AA (19-17)$ | $y_7 - AA (19-16)$ |
|-------------------|-------|--------------|-----------------|--------------------|--------------------|--------------------|
| Koningiopsin Ia   | 754.5 | 736.5        | 637.4           | 509.4              | 381.4              | 282.3              |
| Koningiopsin Ib   | 768.5 | 750.5        | 651.4           | 523.4              | 395.4              | 282.4              |
| Koningiopsin IIa  | 754.5 | 736.5        | 637.4           | 509.4              | 381.4              | 282.3              |
| Koningiopsin IIb  | 768.5 | 750.5        | 651.4           | 523.4              | 395.4              | 282.4              |
| Koningiopsin IIIa | 755.5 | 737.5        | 638.4           | 509.4              | 381.4              | 282.3              |
| Koningiopsin IIIb | 754.5 | 736.5        | 637.4           | 509.4              | 381.4              | 282.3              |
| Koningiopsin IV   | 768.5 | 750.5        | 651.4           | 523.4              | 395.4              | 282.4              |
| Koningiopsin Va   | 768.5 | 750.5        | 651.4           | 523.4              | 395.4              | 282.4              |
| Koningiopsin Vb   | 769.5 | 751.5        | 652.4           | 523.4              | 395.3              | 282.3              |
| Koningiopsin VIa  | 768.5 | 750.5        | 651.4           | 523.4              | 395.4              | 282.4              |
| Koningiopsin VIb  | 769.5 | 751.5        | 652.4           | 523.4              | 395.3              | 282.3              |

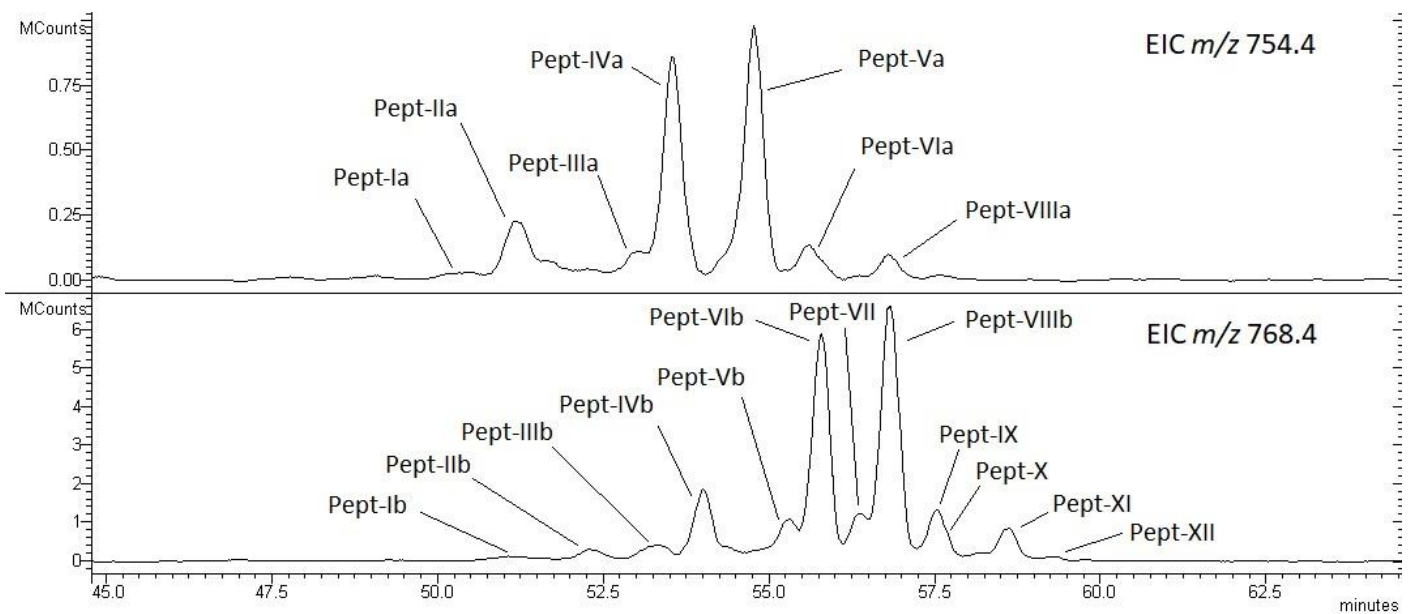

**Supplementary Figure 1: Extracted ion chromatograms (EIC) resulting from full scan measurements of crude extracts from *T. gamsii* SZMC 1656. The coeluted components within some peaks were identified based on MS<sup>2</sup> examinations.**

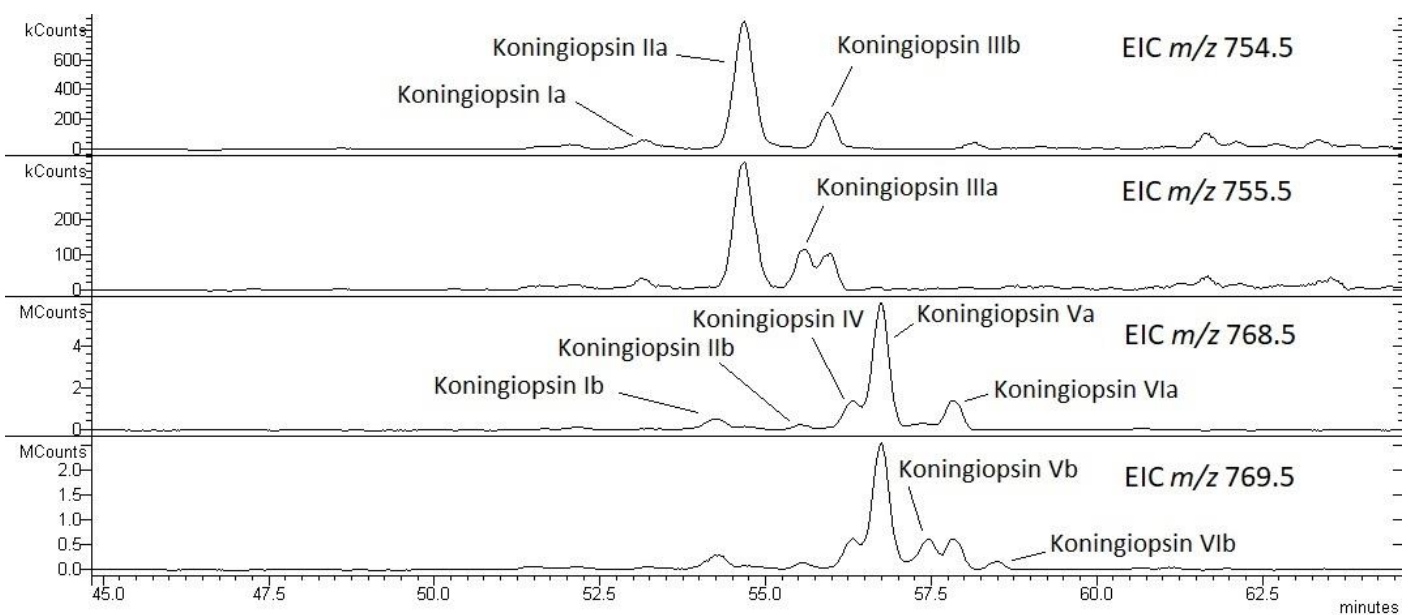

**Supplementary Figure 2: Extracted ion chromatograms (EIC) resulting from full scan measurements of crude extracts prepared from *T. koningiopsis* SZMC 12500**

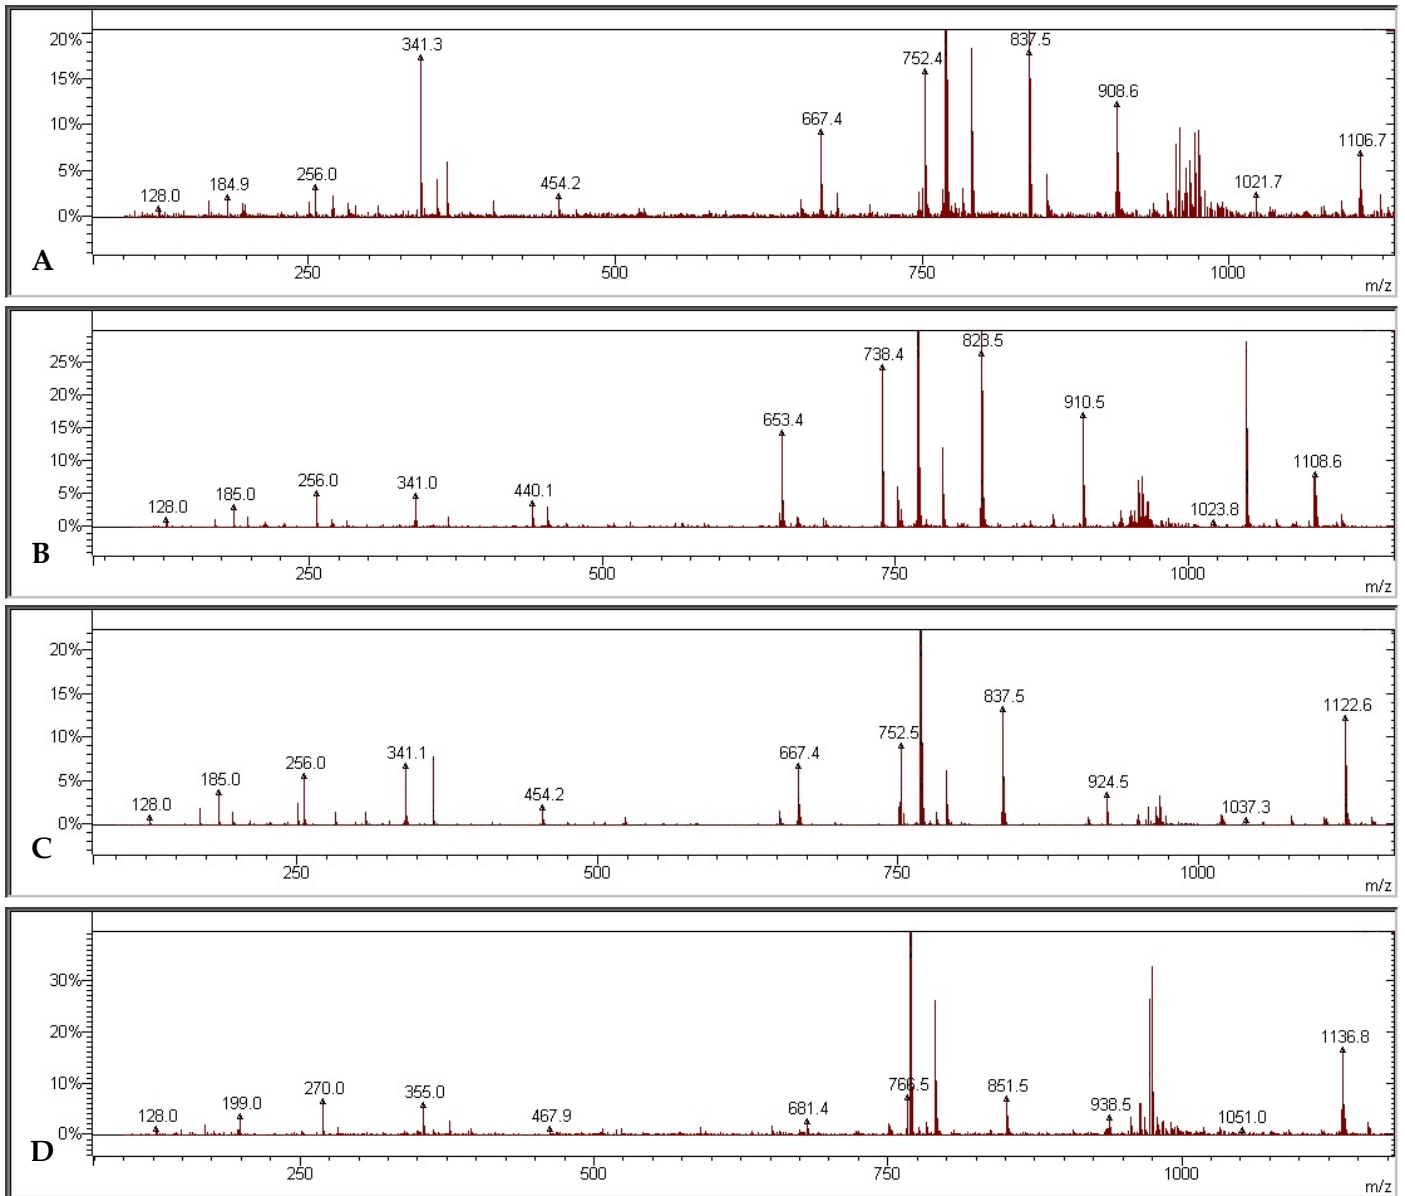

**Supplementary Figure 3: Typical b ion series of described peptaibols ranged from  $b_{12}$  at  $m/z$  1106 (A),  $m/z$  1108 (B),  $m/z$  1122 (C),  $m/z$  1136 (D) resulting from the full scan measurements of crude peptaibol extracts prepared from *T. gamsii* SZMC 1656**

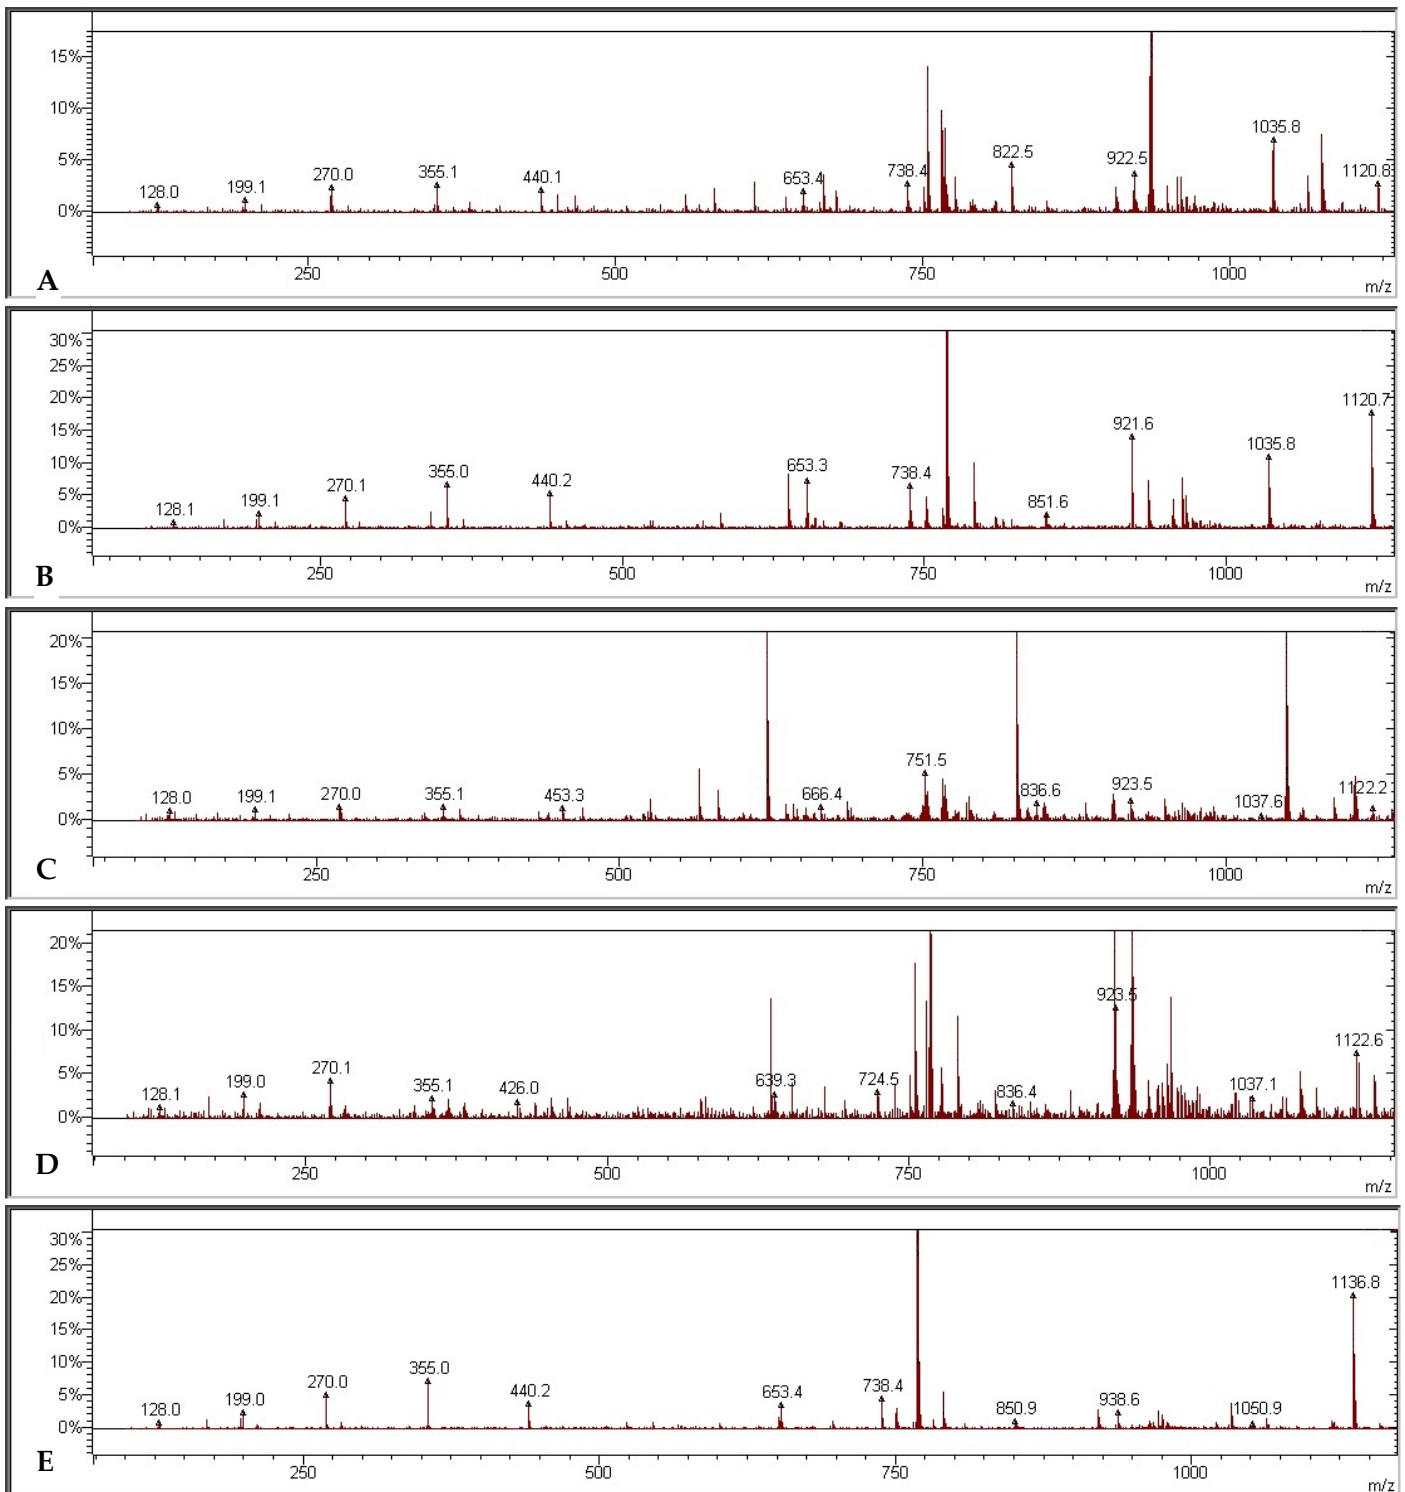

**Supplementary Figure 4: Typical b ion series of described peptaibols ranging from  $b_{12}$  at  $m/z$  1120 (Koningiopsin IIb, IIIb - A),  $m/z$  1120 (Koningiopsins VIa, VIb - B),  $m/z$  1122 (Koningiopsins Ia, Ib- C),  $m/z$  1122 (Koningiopsins IIIa - D),  $m/z$  1136 (Koningiopsins IIa, IV, Va, Vb - E) resulting from the full scan measurements of crude peptaibol extracts prepared from *T. koningiopsis* SZMC 12500**

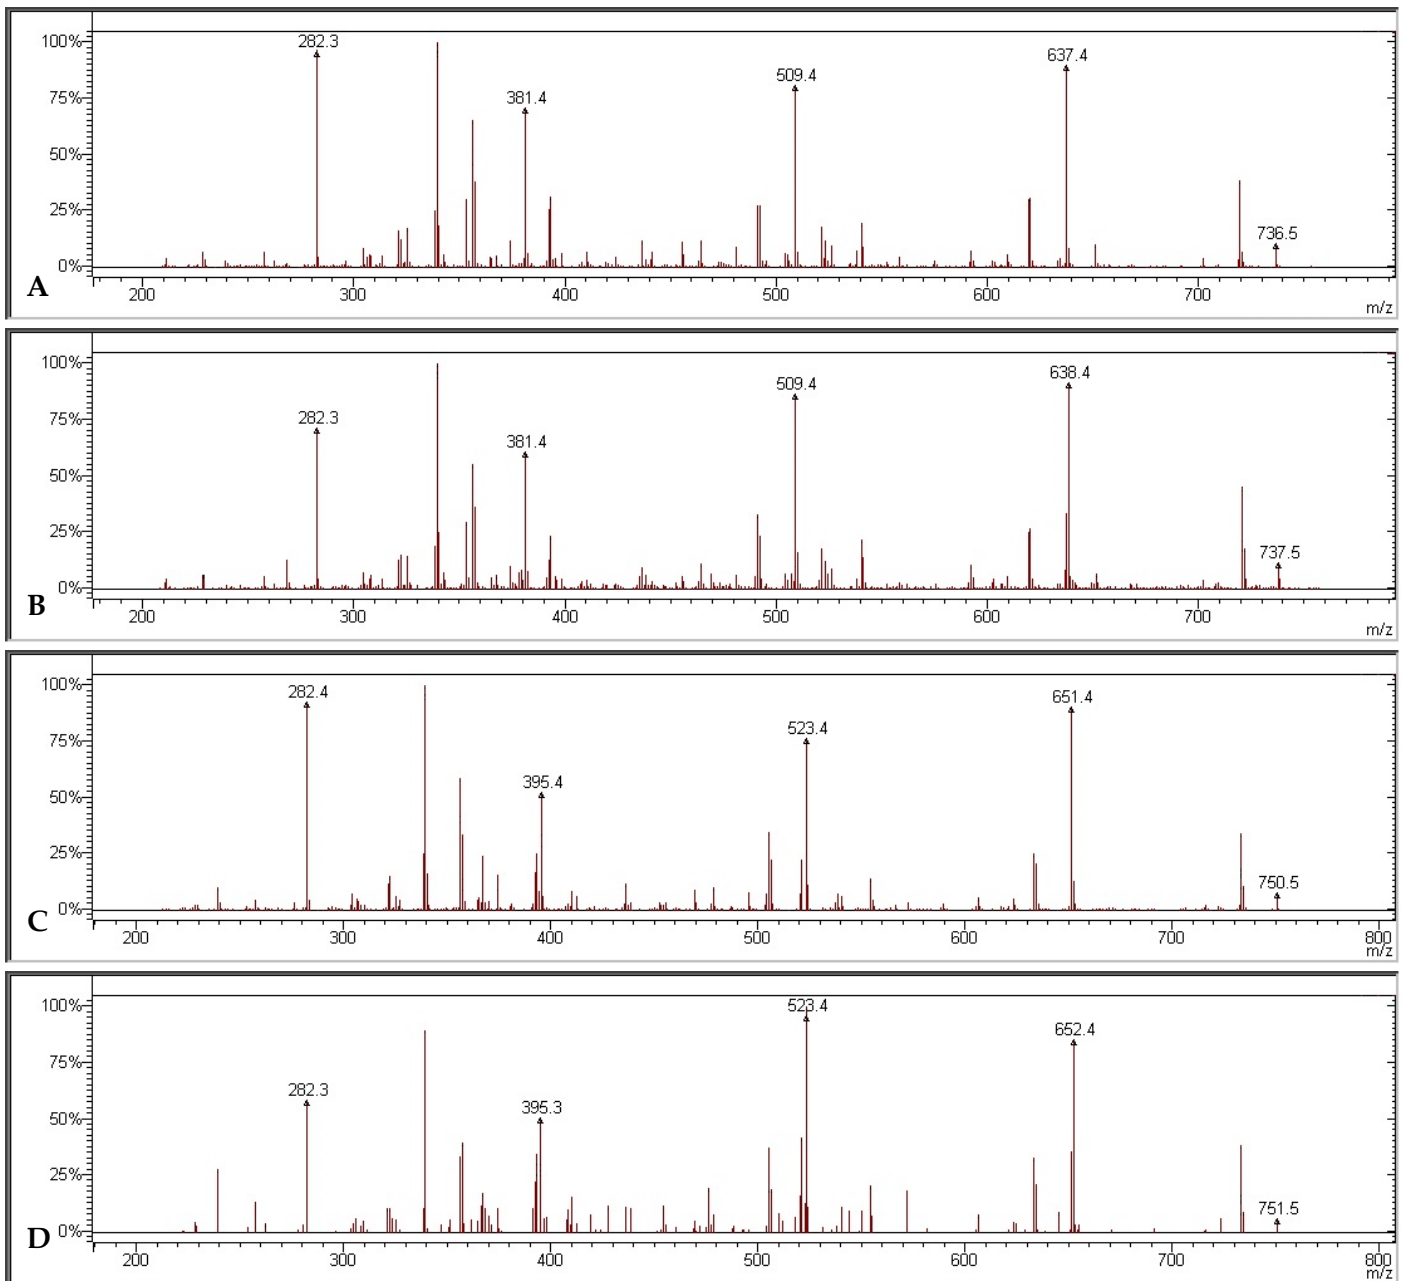

**Supplementary Figure 5: Typical MS<sup>2</sup> spectra of y-ions 754.5 (A), 755.5 (B), 768.5 (C) and 769.5 (D) resulting from the full scan measurements of crude peptaibol extracts. The MS<sup>2</sup> patterns originating from the same *m/z* values were identical.**
